# Supplementary material for: A global atmospheric chemistry model for the fate and transport of PFCAs and their precursors
Source: Royal Society of Chemistry journal article supplement (doi:10.1039/c9em00326f), 2019-12-24
Supplement: c9em00326f1.xlsx [file c9em00326f1.xlsx]

## Sheet: Sheet1
First Author	Pub. Year	Units	Location	Lat	Lon	Year	Reference	TFA	PFPRA	PFBUA	PFPA	PFHXA	PFHPA	PFOA	PFNA	PFDA	PFUNA	PFDOA
Scott	2006	ng m-2 yr-1	Smith Island, MD	38	-76	1998	Environ Sci Technol 2006, 40, 23, 7167-7174	7510	2143	295	767	441	386	726	203
Scott	2006	ng m-2 yr-1	Smith Island, MD	38	-76	1999	Environ Sci Technol 2006, 40, 23, 7167-7174	10090	391	95	94	97	125	397	196
Scott	2006	ng m-2 yr-1	Lewes, DE	39	-75	1998	Environ Sci Technol 2006, 40, 23, 7167-7174	2120	408	89	169	88	80	535	789
Scott	2006	ng m-2 yr-1	Lewes, DE	39	-75	1999	Environ Sci Technol 2006, 40, 23, 7167-7174	5520	280	75	47	52	67	477	330
Scott	2006	ng m-2 yr-1	Ithaca, NY	42	-77	1998	Environ Sci Technol 2006, 40, 23, 7167-7174	1870	449	69	129	113	66	143	33
Scott	2006	ng m-2 yr-1	Ithaca, NY	42	-77	1999	Environ Sci Technol 2006, 40, 23, 7167-7174	3720	188	53	59	58	54	175	70
Scott	2006	ng m-2 yr-1	Underhill, VT	45	-73	1999	Environ Sci Technol 2006, 40, 23, 7167-7174	4720	166	43	49	50	69	113	60
Scott	2006	ng m-2 yr-1	Kejimkujik, NW	44	-65	2002	Environ Sci Technol 2006, 40, 23, 7167-7174	852	101	8	9	6	16	12	12
Scott	2006	ng m-2 yr-1	Algoma, ON	48	-85	2002	Environ Sci Technol 2006, 40, 23, 7167-7174	786	86	11	13	9	13	13	11
Scott	2006	ng m-2 yr-1	Saturna Island, BC	49	-123	2002	Environ Sci Technol 2006, 40, 23, 7167-7174	441	62	7	8	6	12	3	1
Scott	2006	ng m-2 yr-1	Egbert, ON	44	-80	2003	Environ Sci Technol 2006, 40, 23, 7167-7174	1605	15.6	6	6	13	39	51	37
Scott	2006	ng m-2 yr-1	Toronto, ON	44	-79	2003	Environ Sci Technol 2006, 40, 23, 7167-7174	4620	92	24	38	30	60	169	17
Kwok	2010	ng m-2 yr-1	Tsukuba, Japan	36	140	2006	Environ Sci Technol 2010, 44, 7043-7049		10510	1280	676	1590	1050	2620	2060	655	552	200
Kwok	2010	ng m-2 yr-1	Tsukuba, Japan	36	140	2007	Environ Sci Technol 2010, 44, 7043-7049		4530	2030	696	659	579	1290	2180	448	465	42
Kwok	2010	ng m-2 yr-1	Kawaguchi, Japan	36	140	2006	Environ Sci Technol 2010, 44, 7043-7049		8380	1420	826	1350	1130	2910	3160	533	741	120
Kwok	2010	ng m-2 yr-1	Kawaguchi, Japan	36	140	2007	Environ Sci Technol 2010, 44, 7043-7049		6150	1660	808	1020	837	2040	1380	297	328	53
Kwok	2010	ng m-2 yr-1	Slingerlands, NY	43	-74	2006	Environ Sci Technol 2010, 44, 7043-7049		3810		219	834	627	2050	2070	243	456	37
Kwok	2010	ng m-2 yr-1	Albany, NY	43	-74	2006	Environ Sci Technol 2010, 44, 7043-7049		9020		857	1050	534	2090	2320	297	794	55
Kirchgeorg	2013	ng m-2 yr-1		45	7	2008	Environ Pollut 2013, 178, 367-374			242				206	86
Kirchgeorg	2013	ng m-2 yr-1		45	7	2008	Environ Pollut 2013, 178, 367-374			245				205	923		10
Kirchgeorg	2013	ng m-2 yr-1		45	7	2008	Environ Pollut 2013, 178, 367-374			321				206	108		223
Kirchgeorg	2013	ng m-2 yr-1		45	7	2008	Environ Pollut 2013, 178, 367-374			394				213	112		31
Kirchgeorg	2013	ng m-2 yr-1		45	7	2008	Environ Pollut 2013, 178, 367-374			445				218	113		40
Kirchgeorg	2013	ng m-2 yr-1		45	7	2008	Environ Pollut 2013, 178, 367-374			437				171	99		49
Kirchgeorg	2013	ng m-2 yr-1		45	7	2008	Environ Pollut 2013, 178, 367-374			545				165	103		53
Scott	2006	ng L-1	Smith Island, MD	38	-76	1998	Environ Sci Technol 2006, 40, 23, 7167-7174			5	2	2.04	1.76	1.9	1.4
Scott	2006	ng L-1	Smith Island, MD	38	-76	1999	Environ Sci Technol 2006, 40, 23, 7167-7174			0.8	0.3	0.36	0.26	0.47	0.51
Scott	2006	ng L-1	Lewes, DE	39	-75	1998	Environ Sci Technol 2006, 40, 23, 7167-7174			1	1	1.8	0.73	7.3	2.8
Scott	2006	ng L-1	Lewes, DE	39	-75	1999	Environ Sci Technol 2006, 40, 23, 7167-7174			2	0.67	0.6	0.48	0.5	0.7
Scott	2006	ng L-1	Ithaca, NY	42	-77	1998	Environ Sci Technol 2006, 40, 23, 7167-7174			1	2.3	1	1	1	0.56
Scott	2006	ng L-1	Ithaca, NY	42	-77	1999	Environ Sci Technol 2006, 40, 23, 7167-7174			0.5	0.6	0.44	0.54	0.47	0.51
Scott	2006	ng L-1	Underhill, VT	45	-73	1999	Environ Sci Technol 2006, 40, 23, 7167-7174			0.3	0.6	0.44	0.54	0.87	0.44
Scott	2006	ng L-1	Kejimkujik, NW	44	-65	2002	Environ Sci Technol 2006, 40, 23, 7167-7174			0.53	0.44	0.48	0.73	0.56	0.57
Scott	2006	ng L-1	Algoma, ON	48	-85	2002	Environ Sci Technol 2006, 40, 23, 7167-7174			2.34	0.28	0.55	0.56	0.78	0.87
Scott	2006	ng L-1	Saturna Island, BC	49	-123	2002	Environ Sci Technol 2006, 40, 23, 7167-7174			0.71	0.78	0.57	1	0.45	0.53
Scott	2006	ng L-1	Egbert, ON	44	-80	2003	Environ Sci Technol 2006, 40, 23, 7167-7174			0.28	0.2	0.22	0.49	1.6	1.28	0.28	0.29	0.48
Scott	2006	ng L-1	Toronto, ON	44	-79	2003	Environ Sci Technol 2006, 40, 23, 7167-7174			0.46	0.47	0.42	0.4	3.3	2.2	0.29	0.51	0.6
Barton	2007	ng L-1	Parkersburg, WV	39	-82	2005	J Environ Monitor 2007, 9, 839-846							11.3
Barton	2007	ng L-1	Parkersburg, WV	39	-82	2005	J Environ Monitor 2007, 9, 839-846							10.2
Barton	2007	ng L-1	Parkersburg, WV	39	-82	2005	J Environ Monitor 2007, 9, 839-846
Barton	2007	ng L-1	Parkersburg, WV	39	-82	2005	J Environ Monitor 2007, 9, 839-846							52.9
Barton	2007	ng L-1	Parkersburg, WV	39	-82	2005	J Environ Monitor 2007, 9, 839-846
Barton	2007	ng L-1	Parkersburg, WV	39	-82	2005	J Environ Monitor 2007, 9, 839-846
Barton	2007	ng L-1	Parkersburg, WV	39	-82	2005	J Environ Monitor 2007, 9, 839-846
Barton	2007	ng L-1	Parkersburg, WV	39	-82	2005	J Environ Monitor 2007, 9, 839-846
Kim	2007	ng L-1	Albany, NY	43	-74	2006	Environ Sci Technol 2007, 41, 8328-8334						0.69	2.53	1.27	0.41	0.44
Kim	2007	ng L-1	Albany, NY	43	-74	2006	Environ Sci Technol 2007, 41, 8328-8334						0.56	2.15	1.04		0.41
Kim	2007	ng L-1	Albany, NY	43	-74	2006	Environ Sci Technol 2007, 41, 8328-8334						0.76	0.85	0.93	0.34	0.46	0.42
Kim	2007	ng L-1	Albany, NY	43	-74	2006	Environ Sci Technol 2007, 41, 8328-8334						0.45	4.89	0.91	0.45	0.3
Kim	2007	ng L-1	Albany, NY	43	-74	2006	Environ Sci Technol 2007, 41, 8328-8334						0.39	2.72	0.55	0.32
Kim	2007	ng L-1	Albany, NY	43	-74	2006	Environ Sci Technol 2007, 41, 8328-8334						1.27	1.4	1.11	0.37	0.33	0.2
Loos	2007	ng L-1	Northern Italy	45	8	2006	Anal Bioanal Chem 2007, 387, 1469-1478						0.81	4.35	1.41	0.75	0.55	0.33
Taniyasu	2008	ng L-1	Tsukuba, Japan	36	140	2007	Anal Chim Acta 2008, 619, 221-230			0.987	0.464	0.483	0.517	0.991	1.76	0.559	0.476	0.225
Taniyasu	2008	ng L-1	Tsukuba, Japan	36	140	2007	Anal Chim Acta 2008, 619, 221-230			2.03	1.11	1.49	1.16	1.74	4.17	0.824	0.643	0.154
Taniyasu	2008	ng L-1	Kawaguchi, Japan	36	140	2007	Anal Chim Acta 2008, 619, 221-230			0.894	0.764	2.74	3.06	3.78	1.08	0.519	0.348	0.135
Taniyasu	2008	ng L-1	Kawaguchi, Japan	36	140	2007	Anal Chim Acta 2008, 619, 221-230			1.56	0.602	0.937	0.78	1.33	2.36	0.593	0.653	0.186
Liu	2009	ng L-1	Shenyang, China	42	123	2007	Chin Sci Bull 2009, 54, 2440-2445						2.9	3.3
Liu	2009	ng L-1	Dalian, China	39	122	2006	Environ International 2009, 35, 737-742						4.8	32.9
Liu	2009	ng L-1	Dalian, China	39	122	2006	Environ International 2009, 35, 737-742						5.12	16.7
Liu	2009	ng L-1	Dalian, China	39	122	2006	Environ International 2009, 35, 737-742							12
Liu	2009	ng L-1	Dalian, China	39	122	2006	Environ International 2009, 35, 737-742						23.5	40.8
Liu	2009	ng L-1	Dalian, China	39	122	2006	Environ International 2009, 35, 737-742						1.8	9.16
Liu	2009	ng L-1	Dalian, China	39	122	2007	Environ International 2009, 35, 737-742						1.66	7.74
Liu	2009	ng L-1	Dalian, China	39	122	2007	Environ International 2009, 35, 737-742						37.7	56.7
Mahmoud	2009	ng L-1	Kyoto, Japan	35	136	2007	Chemosphere 2009, 74, 467-472
Murakami	2009	ng L-1	Tokyo, Japan	36	140	2007	Chemosphere 2009, 74, 487-493						15	9.6	0.93	0.55
Dreyer	2010	ng L-1	Barsbuttel, Germany	54	10	2007	Environ Pollut 2010, 158, 1221-1227								0.5	0.1		0.1
Dreyer	2010	ng L-1	Barsbuttel, Germany	54	10	2007	Environ Pollut 2010, 158, 1221-1227						0.2	0.4	0.4	0.2
Dreyer	2010	ng L-1	Barsbuttel, Germany	54	10	2007	Environ Pollut 2010, 158, 1221-1227			0.9		0.3	0.4		1.3	0.5		0.2
Dreyer	2010	ng L-1	Barsbuttel, Germany	54	10	2007	Environ Pollut 2010, 158, 1221-1227			1.4		0.1	0.1	1.8	0.2	0.1
Dreyer	2010	ng L-1	Barsbuttel, Germany	54	10	2007	Environ Pollut 2010, 158, 1221-1227			0.6				0.8	0.1
Dreyer	2010	ng L-1	Barsbuttel, Germany	54	10	2007	Environ Pollut 2010, 158, 1221-1227			4.6		0.2		1.6	0.1	0.3
Dreyer	2010	ng L-1	Barsbuttel, Germany	54	10	2008	Environ Pollut 2010, 158, 1221-1227			1				0.6	0.1
Dreyer	2010	ng L-1	Barsbuttel, Germany	54	10	2008	Environ Pollut 2010, 158, 1221-1227			1.1			0.2	1.4	0.1
Dreyer	2010	ng L-1	Barsbuttel, Germany	54	10	2008	Environ Pollut 2010, 158, 1221-1227			1.8		0.1	0.1	1.6	0.3		0.1
Dreyer	2010	ng L-1	Barsbuttel, Germany	54	10	2008	Environ Pollut 2010, 158, 1221-1227			1.6		0.2	0.1	0.9	0.2	0.3	0.1	0.1
Dreyer	2010	ng L-1	Barsbuttel, Germany	54	10	2008	Environ Pollut 2010, 158, 1221-1227			5.3		0.4	0.3	3.4	0.8	0.7	0.3	0.4
Dreyer	2010	ng L-1	Barsbuttel, Germany	54	10	2008	Environ Pollut 2010, 158, 1221-1227			1.2		0.1	0.1	1.8	0.4	0.2
Dreyer	2010	ng L-1	Barsbuttel, Germany	54	10	2008	Environ Pollut 2010, 158, 1221-1227			2.6		0.1	0.1	1.4	0.2	0.1
Dreyer	2010	ng L-1	Barsbuttel, Germany	54	10	2008	Environ Pollut 2010, 158, 1221-1227			0.6				0.6	0.2	0.1
Dreyer	2010	ng L-1	Barsbuttel, Germany	54	10	2008	Environ Pollut 2010, 158, 1221-1227			3.2		0.5	0.4	2.7	0.8	0.4	0.2	0.1
Dreyer	2010	ng L-1	Barsbuttel, Germany	54	10	2008	Environ Pollut 2010, 158, 1221-1227			1.2		0.1		0.5	0.2	0.1		0.1
Dreyer	2010	ng L-1	Barsbuttel, Germany	54	10	2008	Environ Pollut 2010, 158, 1221-1227			1.9		0.2	0.2	1.2	0.6	0.4	0.2	0.1
Dreyer	2010	ng L-1	Barsbuttel, Germany	54	10	2008	Environ Pollut 2010, 158, 1221-1227			3.6		0.5	0.3	1.7	1.2	0.9	0.6	0.4
Dreyer	2010	ng L-1	Barsbuttel, Germany	54	10	2008	Environ Pollut 2010, 158, 1221-1227			9.4		1.9	1.2	9.3	3.7	7.5	1.4	1.8	1.9
Dreyer	2010	ng L-1	Barsbuttel, Germany	54	10	2008	Environ Pollut 2010, 158, 1221-1227			2.2		0.7	0.6	2	1.6	0.7	0.7	0.5
Kwok	2010	ng L-1	Tsukuba, Japan	36	140	2007	Environ Sci Technol 2010, 44, 7043-7049			2.18	0.73	1	0.77	1.81	2.38	0.47	0.43	0.11
Kwok	2010	ng L-1	Tsukuba, Japan	36	140	2007	Environ Sci Technol 2010, 44, 7043-7049			0.93	0.5	1.03	0.996	1.1	3.99	0.6	0.48	0.18
Kwok	2010	ng L-1	Kawaguchi, Japan	36	140	2007	Environ Sci Technol 2010, 44, 7043-7049			0.98	0.64	0.88	0.76	1.94	1.62	0.34	0.36	0.06
Kwok	2010	ng L-1	Kawaguchi, Japan	36	140	2007	Environ Sci Technol 2010, 44, 7043-7049			0.44	0.35	0.89	0.68	1.43	1.04	0.24	0.23	0.1
Kwok	2010	ng L-1	Slingerlands, NY	43	-74	2007	Environ Sci Technol 2010, 44, 7043-7049				0.2	0.66	0.53	1.79	1.73	0.23	0.46	0.04
Kwok	2010	ng L-1	Slingerlands, NY	43	-74	2007	Environ Sci Technol 2010, 44, 7043-7049				0.18	0.52	0.4	0.87	1	0.22	0.52	0.08
Kwok	2010	ng L-1	Albany, NY	43	-74	2007	Environ Sci Technol 2010, 44, 7043-7049			0.17	0.7	0.91	0.59	3.4	1.53	0.26	0.52	0.05
Kwok	2010	ng L-1	Albany, NY	43	-74	2007	Environ Sci Technol 2010, 44, 7043-7049			0.22	0.65	0.76	0.44	1.56	1.11	0.25	0.69	0.08
Kwok	2010	ng L-1	Hong Kong, China	22	114	2007	Environ Sci Technol 2010, 44, 7043-7049			1.02	0.05	0.35	4.58	0.32	0.28	0.19	0.1	0.13
Kwok	2010	ng L-1	Hong Kong, China	22	114	2007	Environ Sci Technol 2010, 44, 7043-7049			0.97	0.11	0.39	1.98	0.3	0.24	0.23	0.1	0.09
Kwok	2010	ng L-1	Patna, India	26	85	2008	Environ Sci Technol 2010, 44, 7043-7049				0.42	0.16	0.07	0.21	0.08	0.09	0.04
Kwok	2010	ng L-1	Patna, India	26	85	2008	Environ Sci Technol 2010, 44, 7043-7049				0.29	0.27	0.19	0.15	0.1	0.1	0.14
Kwok	2010	ng L-1	Toulouse, France	44	1	2008	Environ Sci Technol 2010, 44, 7043-7049				0.26	0.62	0.25	0.21	0.21	0.16
Kwok	2010	ng L-1	Toulouse, France	44	1	2008	Environ Sci Technol 2010, 44, 7043-7049				0.16	0.62	0.25	0.21	0.21	0.16
Scott	2010	ng L-1	Algoma, ON	45	-87	2005	J Great Lakes Res 2010, 36, 277-284
Scott	2010	ng L-1	Sibley, ON	39	-77	2005	J Great Lakes Res 2010, 36, 277-284
Zhang	2010	ng L-1	Beijing, China	40	116	2009	Anal Chem 2010, 82, 2363-2373							3.01	0.64
Meyer	2011	ng L-1	Toronto, ON, Canada	44	-79	2010	Environ Sci Technol 2011, 45, 8113-8119					0.058	0.039	0.049	0.079	0.032	0.049	0.016	0.012
Meyer	2011	ng L-1	Toronto, ON, Canada	44	-79	2010	Environ Sci Technol 2011, 45, 8113-8119					0.12	0.056	0.22	0.16	0.059	0.069	0.0051	0.0007
Meyer	2011	ng L-1	Toronto, ON, Canada	44	-79	2010	Environ Sci Technol 2011, 45, 8113-8119					0.16	0.13	0.33	0.3	0.2	0.14	0.077	0.025
Meyer	2011	ng L-1	Toronto, ON, Canada	44	-79	2010	Environ Sci Technol 2011, 45, 8113-8119					0.13	0.085	0.3	0.23	0.096	0.069	0.027	0.014
Meyer	2011	ng L-1	Toronto, ON, Canada	44	-79	2010	Environ Sci Technol 2011, 45, 8113-8119					0.48	0.39	1.5	0.99	0.49	0.25	0.12	0.044
Muller	2011	ng L-1	Switzerland	47	8	2009	Environ Sci Technol 2011, 45, 9901-9909			0.79	0.11	0.42	0.21	0.75	0.21	0.24	0.14	0.13	0.11
Muller	2011	ng L-1	Switzerland	47	8	2009	Environ Sci Technol 2011, 45, 9901-9909			0.57	0.08	0.43	0.22	0.78	0.21	0.24	0.14	0.09	0.08
Muller	2011	ng L-1	Switzerland	47	8	2009	Environ Sci Technol 2011, 45, 9901-9909			0.74	0.11	0.32	0.16	0.58	0.16	0.14	0.12
Nguyen	2011	ng L-1	Singapore	1	104	2009	Chemosphere 2011, 82, 1277-1285						0.4	1	0.4	0.4	0.4	0.1
Nishikoori	2011	ng L-1	Near Tokyo, Japan	36	140	2009	Chemosphere 2011, 84, 1125-1132							0.61		0.64
Zhao	2011	ng L-1	Beijing, China	40	116	2010	Microchem J 2011, 98, 207-214							2.73	3.76	0.46	0.25
